# Supplementary material for: Polyethylenimine Nanoparticle-Mediated siRNA Delivery to Reduce α-Synuclein Expression in a Model of Parkinson’s Disease
Source: PubMed Central journal article supplement — Mol Ther Nucleic Acids. 2017 Aug 30;9:57–68. doi: 10.1016/j.omtn.2017.08.013 (PMC5602522; doi:10.1016/j.omtn.2017.08.013), 2017-08-30
Supplement: mmc1.pdf [file mmc1.pdf]

OMTN, Volume 9

## Supplemental Information

### **Polyethylenimine Nanoparticle-Mediated siRNA**

### **Delivery to Reduce $\alpha$ -Synuclein Expression**

### **in a Model of Parkinson's Disease**

**Christin Helmschrodt, Sabrina Höbel, Sandra Schöniger, Anne Bauer, Jana Bonicelli, Marieke Gringmuth, Simone A. Fietz, Achim Aigner, Angelika Richter, and Franziska Richter**

## Suppl Fig 1

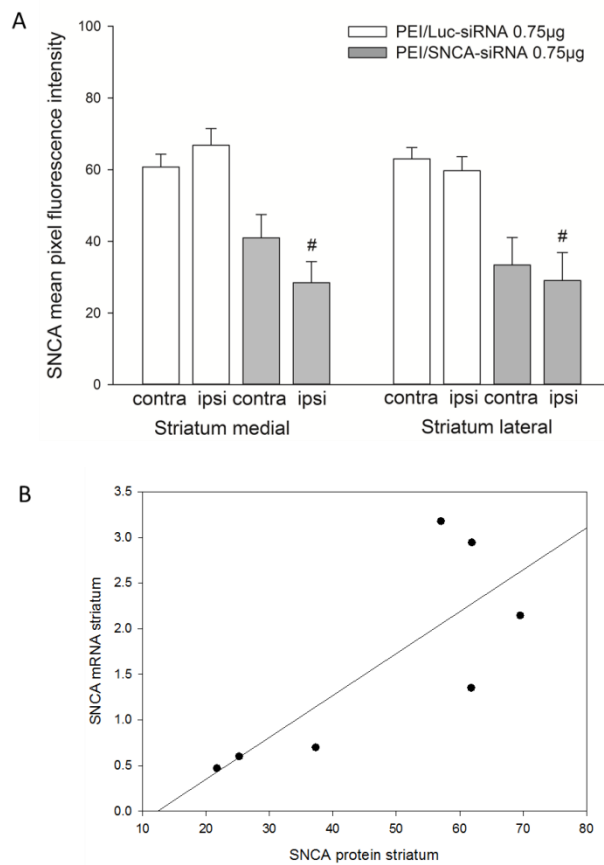

Suppl Fig. 1 (A) Knockdown of SNCA protein in Thy1-aSyn mice by a single ICV injection of PEI/SNCA-siRNA nanoparticles into the lateral ventricle was moderately stronger in the striatum ipsilateral to the injection site compared to the contralateral hemisphere (<sup>#</sup> $p < 0.05$  paired student's t-test). (B) Levels of mRNA and protein were positively correlated between mice across treatment groups (spearman correlation, correlation coefficient 0.75,  $p = 0.038$ ).
